# Supplementary material for: Association of Serum Neurofilament Light Levels With Long-term Brain Atrophy in Patients With a First Multiple Sclerosis Episode
Source: PubMed Central journal article supplement — JAMA Netw Open. 2020 Nov 5;3(11):e2016278. doi: 10.1001/jamanetworkopen.2020.16278 (PMC7645699; doi:10.1001/jamanetworkopen.2020.16278), 2020-11-05
Supplement: jamanetwopen-e2016278-s001.pdf [file jamanetwopen-e2016278-s001.pdf]

## Supplemental Online Content

Plavina T, Singh CM, Sangurdekar D, et al. Association of serum neurofilament light levels with long-term brain atrophy in patients with a first multiple sclerosis episode. *JAMA Netw Open*. 2020;3(11):e2016278. doi:10.1001/jamanetworkopen.2020.16278

**eFigure 1.** Association of Baseline Serum Neurofilament Light Concentrations With Baseline Magnetic Resonance Imaging Measurements of Disease Burden

**eFigure 2.** Association of Baseline Serum Neurofilament Light Concentration With Brain Atrophy

**eTable.** Data Points Available for the CHAMPS and CHAMPIONS Studies

This supplemental material has been provided by the authors to give readers additional information about their work.

**eFigure 1.** Association of Baseline Serum Neurofilament Light Concentrations With Baseline Magnetic Resonance Imaging Measurements of Disease Burden

A. Associations derived for BL sNfL concentration (stratified by tertiles) and number of gadolinium-enhancing (Gd<sup>+</sup>) lesions. B, Associations derived for BL sNfL concentration (stratified by tertiles) and T2 lesion volumes. [ ] in range indicates number before or after bracket is included; () in range indicates the number before or after the parentheses is not included in the range.

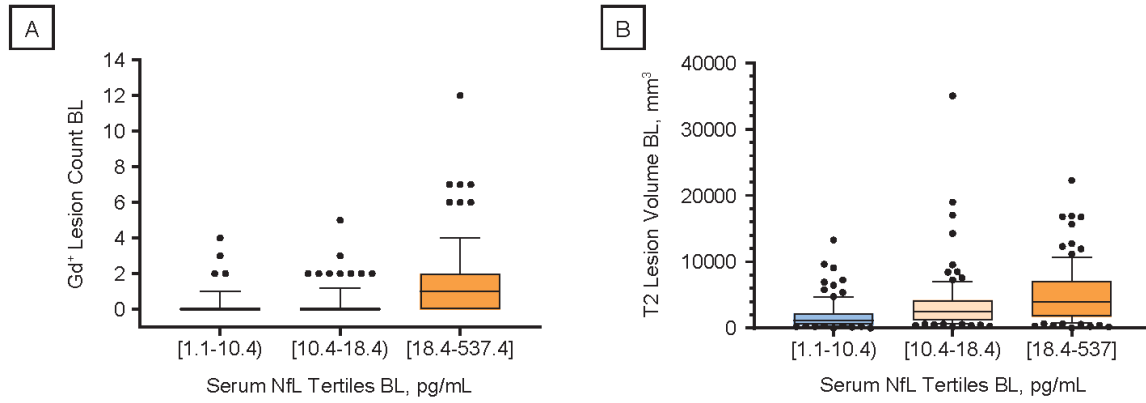

**eFigure 2.** Association of Baseline Serum Neurofilament Light Concentration With Brain Atrophy

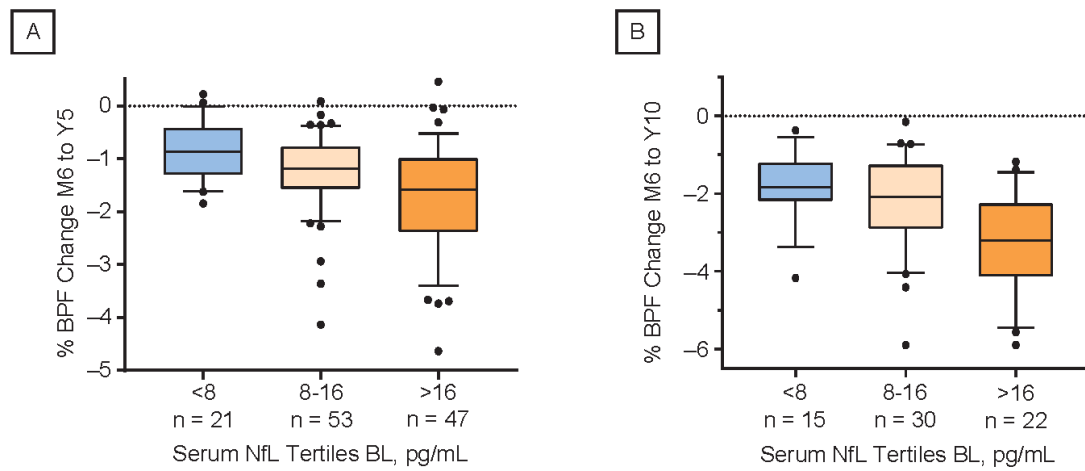

Concentration is stratified by the proposed sNfL thresholds<sup>27</sup> (8 pg/mL and 16 pg/mL). A, Association between BL sNfL concentration and brain atrophy (percent BPF) from Month (M) 6 to 5 years. B, Association between BL sNfL concentration and brain atrophy (percent BPF) from M6 to 10 years.

**eTable.** Data Points Available for the CHAMPS and CHAMPIONS Studies

| Clinical and MRI Measurements  | CHAMPS (IFN $\beta$ -1a and Placebo) |         |          |          |          |          |          | CHAMPIONS | CHAMPIONS Extension |        |         |
|--------------------------------|--------------------------------------|---------|----------|----------|----------|----------|----------|-----------|---------------------|--------|---------|
|                                | BL                                   | Month 6 | Month 12 | Month 18 | Month 24 | Month 30 | Month 36 | Year 5    | Year 6              | Year 9 | Year 10 |
| EDSS score                     | 383                                  | 328     | 283      | 255      | 197      | 116      | 53       | 195       | 172                 | 106    | 127     |
| BPF                            | 353                                  | 297     | 267      | 243      |          |          |          | 182       |                     |        | 112     |
| T2 volume                      | 366                                  | 298     | 259      | 230      |          |          |          | 181       |                     |        | 110     |
| Number of T2 lesions           | 377                                  | 317     | 275      | 251      |          |          |          | 189       |                     |        | 110     |
| Gd <sup>+</sup> volume         | 361                                  | 316     | 270      | 248      |          |          |          | 185       |                     |        | 108     |
| No. of Gd <sup>+</sup> lesions | 362                                  | 317     | 271      | 248      |          |          |          | 185       |                     |        | 108     |
| sNfL                           | 308                                  |         |          |          | 139      |          |          |           |                     |        |         |

Abbreviations: BL, baseline; BPF, brain parenchymal fraction; CHAMPS, Controlled High-Risk Avonex Multiple Sclerosis Prevention Study; EDSS, Expanded

Disability Status Scale; Gd<sup>+</sup>, gadolinium enhancing; MRI, magnetic resonance imaging; sNfL, serum neurofilament light chain.

<sup>a</sup> Numbers indicate the number of available samples at each time point. Absence of a number represents no data available.
